# Supplementary material for: Regionale Unterschiede und Trends in gesunder Lebenserwartung in Deutschland
Source: Springer Nature journal article supplement (doi:10.1007/s00103-024-03864-y), 2024-04-12
Supplement: MOESM1 [file 26970012]

## Onlinematerial zum Beitrag „Regionale Unterschiede und Trends in gesunder Lebenserwartung in Deutschland“

Elke Loichinger, Thomas Skora, Markus Sauerberg, Pavel Grigoriev (2024)

Tab. A1: Anteil der Bevölkerung in schlechter Gesundheit nach Geschlecht, Altersgruppe, Zeitraum und Region

| Altersgruppe  | Zeitraum  | Deutschland Gesamt |              |        |       | Norden |              |        |       | Osten |              |        |       | Westen |              |        |       | Süden |              |        |       |
|---------------|-----------|--------------------|--------------|--------|-------|--------|--------------|--------|-------|-------|--------------|--------|-------|--------|--------------|--------|-------|-------|--------------|--------|-------|
|               |           | N                  | Prävalenz, % |        |       | N      | Prävalenz, % |        |       | N     | Prävalenz, % |        |       | N      | Prävalenz, % |        |       | N     | Prävalenz, % |        |       |
|               |           |                    | Est.         | low_CI | up_CI |        | Est.         | low_CI | up_CI |       | Est.         | low_CI | up_CI |        | Est.         | low_CI | up_CI |       | Est.         | low_CI | up_CI |
| <b>Männer</b> |           |                    |              |        |       |        |              |        |       |       |              |        |       |        |              |        |       |       |              |        |       |
| <b>20-24</b>  | 2002-2007 | 2201               | 2,2          | 1,6    | 2,9   | 297    | 3,3          | 1,3    | 5,1   | 606   | 2,4          | 1,3    | 3,6   | 717    | 2,4          | 1,4    | 3,6   | 581   | 1,3          | 0,5    | 2,4   |
|               | 2008-2013 | 1764               | 2,8          | 2,1    | 3,6   | 240    | 1,7          | 0,4    | 3,3   | 511   | 3,0          | 1,6    | 4,5   | 533    | 2,8          | 1,5    | 4,3   | 480   | 3,3          | 1,9    | 5,2   |
|               | 2014-2019 | 3567               | 2,8          | 2,2    | 3,3   | 683    | 3,2          | 2,0    | 4,7   | 579   | 3,1          | 1,7    | 4,7   | 1354   | 2,6          | 1,8    | 3,5   | 951   | 2,4          | 1,5    | 3,5   |
| <b>25-29</b>  | 2002-2007 | 1939               | 2,5          | 1,9    | 3,2   | 261    | 2,9          | 1,1    | 5,0   | 581   | 3,0          | 1,7    | 4,5   | 555    | 2,4          | 1,3    | 3,6   | 542   | 1,8          | 0,7    | 3,1   |
|               | 2008-2013 | 1560               | 4,1          | 3,3    | 5,1   | 215    | 1,4          | 0,0    | 3,3   | 421   | 7,6          | 5,0    | 10,2  | 492    | 4,0          | 2,2    | 5,7   | 432   | 2,3          | 1,2    | 3,9   |
|               | 2014-2019 | 3248               | 4,9          | 4,2    | 5,7   | 576    | 3,9          | 2,4    | 5,6   | 656   | 4,9          | 3,4    | 6,6   | 1178   | 5,3          | 4,1    | 6,6   | 838   | 5,1          | 3,6    | 6,7   |
| <b>30-34</b>  | 2002-2007 | 2492               | 4,2          | 3,5    | 5,0   | 342    | 4,1          | 2,0    | 6,1   | 590   | 4,6          | 3,1    | 6,3   | 861    | 3,8          | 2,7    | 5,2   | 699   | 4,4          | 2,9    | 5,9   |
|               | 2008-2013 | 1561               | 4,0          | 3,1    | 5,0   | 238    | 9,1          | 5,5    | 13,0  | 454   | 4,3          | 2,6    | 6,4   | 434    | 4,4          | 2,8    | 6,2   | 435   | 0,5          | 0,0    | 1,4   |
|               | 2014-2019 | 3534               | 5,3          | 4,7    | 6,0   | 567    | 4,1          | 2,6    | 5,8   | 773   | 6,2          | 4,7    | 8,0   | 1259   | 6,2          | 5,0    | 7,5   | 935   | 4,2          | 2,9    | 5,5   |
| <b>35-39</b>  | 2002-2007 | 3249               | 6,2          | 5,5    | 7,1   | 484    | 8,8          | 6,4    | 11,2  | 674   | 5,9          | 4,3    | 7,6   | 1138   | 5,7          | 4,5    | 7,1   | 953   | 5,8          | 4,2    | 7,3   |
|               | 2008-2013 | 1919               | 4,8          | 3,9    | 5,8   | 258    | 7,9          | 4,7    | 11,2  | 501   | 5,2          | 3,4    | 7,4   | 642    | 4,5          | 3,0    | 6,1   | 518   | 3,2          | 1,7    | 4,8   |
|               | 2014-2019 | 3833               | 6,8          | 6,0    | 7,6   | 610    | 7,5          | 5,4    | 9,7   | 892   | 6,6          | 5,2    | 8,1   | 1258   | 8,4          | 6,9    | 10,0  | 1073  | 4,8          | 3,5    | 6,2   |
| <b>40-44</b>  | 2002-2007 | 3320               | 8,0          | 7,2    | 8,9   | 400    | 7,6          | 5,0    | 10,3  | 831   | 9,9          | 8,1    | 11,9  | 1147   | 7,8          | 6,4    | 9,4   | 942   | 6,9          | 5,3    | 8,5   |
|               | 2008-2013 | 2527               | 11,2         | 10,0   | 12,4  | 388    | 15,5         | 11,9   | 19,1  | 551   | 12,6         | 9,8    | 15,4  | 859    | 9,7          | 7,8    | 11,5  | 729   | 9,6          | 7,4    | 11,8  |
|               | 2014-2019 | 4102               | 9,8          | 8,9    | 10,7  | 662    | 8,6          | 6,3    | 10,7  | 851   | 12,0         | 10,0   | 14,3  | 1405   | 10,9         | 9,3    | 12,7  | 1184  | 7,5          | 6,0    | 9,0   |
| <b>45-49</b>  | 2002-2007 | 3026               | 12,2         | 11,0   | 13,4  | 365    | 12,9         | 9,3    | 16,4  | 851   | 12,1         | 10,0   | 14,3  | 1042   | 13,2         | 10,9   | 15,3  | 768   | 10,7         | 8,6    | 12,8  |
|               | 2008-2013 | 2605               | 11,8         | 10,6   | 13,0  | 298    | 12,7         | 9,4    | 16,8  | 671   | 12,7         | 10,1   | 15,4  | 896    | 10,7         | 8,8    | 12,7  | 740   | 12,0         | 9,9    | 14,5  |
|               | 2014-2019 | 4379               | 15,3         | 14,2   | 16,3  | 722    | 18,2         | 15,6   | 21,2  | 868   | 18,2         | 15,7   | 20,7  | 1562   | 14,7         | 13,0   | 16,6  | 1227  | 12,3         | 10,5   | 14,1  |

| Altersgruppe  | Zeitraum  | Deutschland Gesamt |              |        |       | Norden |              |        |       | Osten |              |        |       | Westen |              |        |       | Süden |              |        |       |
|---------------|-----------|--------------------|--------------|--------|-------|--------|--------------|--------|-------|-------|--------------|--------|-------|--------|--------------|--------|-------|-------|--------------|--------|-------|
|               |           | N                  | Prävalenz, % |        |       | N      | Prävalenz, % |        |       | N     | Prävalenz, % |        |       | N      | Prävalenz, % |        |       | N     | Prävalenz, % |        |       |
|               |           |                    | Est.         | low_CI | up_CI |        | Est.         | low_CI | up_CI |       | Est.         | low_CI | up_CI |        | Est.         | low_CI | up_CI |       | Est.         | low_CI | up_CI |
| 50-54         | 2002-2007 | 2759               | 19,5         | 18,1   | 20,9  | 374    | 18,1         | 14,2   | 22,5  | 725   | 20,1         | 17,2   | 22,9  | 942    | 20,2         | 17,6   | 22,8  | 718   | 18,8         | 16,0   | 21,7  |
|               | 2008-2013 | 2485               | 18,2         | 16,5   | 19,8  | 329    | 17,4         | 13,4   | 21,3  | 703   | 22,4         | 19,2   | 25,5  | 830    | 20,4         | 17,7   | 23,0  | 623   | 10,9         | 8,7    | 13,5  |
|               | 2014-2019 | 3868               | 17,9         | 16,7   | 19,1  | 570    | 21,7         | 18,1   | 24,9  | 808   | 19,8         | 17,1   | 22,5  | 1440   | 17,5         | 15,6   | 19,2  | 1050  | 15,0         | 13,0   | 17,2  |
| 55-59         | 2002-2007 | 2474               | 23,4         | 21,7   | 25,1  | 374    | 24,4         | 20,1   | 28,9  | 621   | 23,4         | 20,0   | 26,6  | 861    | 23,7         | 20,7   | 26,7  | 618   | 22,5         | 19,4   | 25,7  |
|               | 2008-2013 | 2287               | 27,3         | 25,4   | 29,3  | 305    | 27,8         | 23,0   | 33,1  | 649   | 31,0         | 27,6   | 34,5  | 758    | 26,9         | 23,6   | 29,9  | 575   | 23,5         | 20,2   | 27,0  |
|               | 2014-2019 | 3006               | 21,8         | 20,3   | 23,4  | 423    | 21,1         | 17,3   | 25,1  | 747   | 22,5         | 19,7   | 25,7  | 1067   | 23,5         | 20,9   | 26,1  | 769   | 19,2         | 16,6   | 22,1  |
| 60-64         | 2002-2007 | 2690               | 30,2         | 28,5   | 31,9  | 412    | 24,0         | 20,1   | 28,2  | 737   | 35,2         | 31,5   | 38,7  | 892    | 31,0         | 28,0   | 34,0  | 649   | 27,4         | 24,0   | 30,8  |
|               | 2008-2013 | 2166               | 29,9         | 28,0   | 31,8  | 314    | 26,6         | 22,0   | 31,8  | 561   | 37,7         | 33,9   | 41,9  | 722    | 25,6         | 22,4   | 28,8  | 569   | 29,4         | 25,8   | 32,9  |
|               | 2014-2019 | 2548               | 30,0         | 28,1   | 31,7  | 391    | 34,1         | 29,7   | 38,6  | 744   | 33,7         | 30,4   | 37,1  | 806    | 26,7         | 23,6   | 29,7  | 607   | 27,0         | 23,6   | 30,3  |
| 65-69         | 2002-2007 | 2293               | 32,4         | 30,5   | 34,1  | 316    | 25,9         | 21,2   | 31,0  | 673   | 36,2         | 32,5   | 40,0  | 788    | 31,5         | 28,3   | 34,8  | 516   | 32,7         | 28,7   | 36,6  |
|               | 2008-2013 | 2254               | 31,8         | 29,9   | 33,8  | 362    | 24,3         | 19,9   | 28,7  | 631   | 38,3         | 34,4   | 42,2  | 694    | 32,2         | 28,8   | 35,7  | 567   | 28,9         | 25,0   | 32,6  |
|               | 2014-2019 | 2264               | 28,7         | 26,9   | 30,6  | 367    | 28,7         | 24,3   | 33,2  | 601   | 27,7         | 24,1   | 31,3  | 711    | 27,5         | 24,2   | 30,7  | 585   | 31,4         | 27,7   | 35,0  |
| 70-74         | 2002-2007 | 1532               | 41,9         | 39,4   | 44,5  | 229    | 33,8         | 27,5   | 39,7  | 413   | 46,1         | 41,2   | 51,1  | 518    | 42,3         | 38,2   | 46,5  | 372   | 41,7         | 36,8   | 46,8  |
|               | 2008-2013 | 2069               | 35,5         | 33,4   | 37,4  | 302    | 30,6         | 25,5   | 35,4  | 614   | 43,3         | 39,4   | 47,4  | 660    | 35,7         | 32,3   | 39,1  | 493   | 28,5         | 24,5   | 32,5  |
|               | 2014-2019 | 1987               | 30,4         | 28,3   | 32,5  | 353    | 25,3         | 21,2   | 30,0  | 504   | 36,4         | 32,3   | 40,7  | 602    | 33,1         | 29,7   | 36,9  | 528   | 24,9         | 21,2   | 28,4  |
| 75-79         | 2002-2007 | 923                | 44,5         | 41,3   | 47,7  | 159    | 41,2         | 34,0   | 47,8  | 203   | 47,7         | 40,9   | 54,2  | 312    | 45,7         | 39,7   | 51,0  | 249   | 42,4         | 36,1   | 48,6  |
|               | 2008-2013 | 1187               | 44,2         | 41,4   | 47,0  | 168    | 35,4         | 28,6   | 42,9  | 330   | 50,4         | 44,8   | 55,8  | 393    | 41,1         | 36,9   | 46,1  | 296   | 46,4         | 40,9   | 52,0  |
|               | 2014-2019 | 1724               | 37,6         | 35,4   | 39,8  | 262    | 30,2         | 24,8   | 35,9  | 456   | 41,4         | 37,1   | 46,1  | 555    | 42,0         | 37,8   | 45,8  | 451   | 32,7         | 28,2   | 36,8  |
| <b>Frauen</b> |           |                    |              |        |       |        |              |        |       |       |              |        |       |        |              |        |       |       |              |        |       |
| 20-24         | 2002-2007 | 2315               | 2,7          | 2,0    | 3,4   | 321    | 2,9          | 1,2    | 4,7   | 682   | 3,1          | 1,8    | 4,4   | 703    | 3,1          | 1,8    | 4,4   | 609   | 1,8          | 0,8    | 2,8   |
|               | 2008-2013 | 1790               | 2,7          | 2,0    | 3,5   | 224    | 4,3          | 1,8    | 7,1   | 482   | 3,3          | 1,9    | 5,0   | 581    | 1,9          | 0,9    | 3,1   | 503   | 2,3          | 1,2    | 3,8   |
|               | 2014-2019 | 3146               | 5,2          | 4,4    | 6,0   | 616    | 5,0          | 3,4    | 6,7   | 490   | 4,3          | 2,7    | 6,1   | 1172   | 7,2          | 5,7    | 8,7   | 868   | 3,3          | 2,2    | 4,5   |
| 25-29         | 2002-2007 | 2246               | 3,8          | 3,1    | 4,6   | 306    | 5,2          | 2,9    | 7,8   | 582   | 3,0          | 1,7    | 4,5   | 703    | 3,2          | 2,0    | 4,6   | 655   | 4,6          | 3,1    | 6,3   |

| Altersgruppe | Zeitraum  | Deutschland Gesamt |              |        |       | Norden |              |        |       | Osten |              |        |       | Westen |              |        |       | Süden |              |        |       |
|--------------|-----------|--------------------|--------------|--------|-------|--------|--------------|--------|-------|-------|--------------|--------|-------|--------|--------------|--------|-------|-------|--------------|--------|-------|
|              |           | N                  | Prävalenz, % |        |       | N      | Prävalenz, % |        |       | N     | Prävalenz, % |        |       | N      | Prävalenz, % |        |       | N     | Prävalenz, % |        |       |
|              |           |                    | Est.         | low_CI | up_CI |        | Est.         | low_CI | up_CI |       | Est.         | low_CI | up_CI |        | Est.         | low_CI | up_CI |       | Est.         | low_CI | up_CI |
|              | 2008-2013 | 1848               | 2,8          | 2,1    | 3,6   | 296    | 4,3          | 2,0    | 6,8   | 494   | 2,8          | 1,4    | 4,3   | 533    | 2,9          | 1,7    | 4,5   | 525   | 1,9          | 0,8    | 3,2   |
|              | 2014-2019 | 3248               | 5,6          | 4,8    | 6,4   | 527    | 7,1          | 4,9    | 9,1   | 758   | 4,3          | 3,0    | 5,8   | 1146   | 7,6          | 6,1    | 9,2   | 817   | 3,0          | 1,8    | 4,0   |
| <b>30-34</b> | 2002-2007 | 2741               | 5,3          | 4,4    | 6,2   | 368    | 7,0          | 4,3    | 9,8   | 585   | 4,6          | 3,1    | 6,3   | 971    | 5,3          | 4,0    | 6,8   | 817   | 4,9          | 3,5    | 6,6   |
|              | 2008-2013 | 1882               | 6,0          | 5,0    | 7,1   | 269    | 8,6          | 5,6    | 11,9  | 515   | 7,4          | 5,2    | 9,7   | 580    | 5,7          | 3,8    | 7,6   | 518   | 3,7          | 2,1    | 5,4   |
|              | 2014-2019 | 4230               | 8,6          | 7,7    | 9,4   | 742    | 9,7          | 7,7    | 12,1  | 944   | 10,1         | 8,2    | 12,2  | 1440   | 9,6          | 8,1    | 11,0  | 1104  | 5,2          | 3,9    | 6,6   |
| <b>35-39</b> | 2002-2007 | 3441               | 7,9          | 7,0    | 8,8   | 497    | 8,6          | 6,2    | 10,9  | 728   | 6,5          | 4,5    | 8,2   | 1234   | 7,9          | 6,4    | 9,4   | 982   | 8,7          | 6,9    | 10,4  |
|              | 2008-2013 | 2195               | 6,9          | 5,8    | 7,9   | 294    | 5,1          | 2,7    | 7,8   | 487   | 7,4          | 5,1    | 9,9   | 781    | 6,8          | 5,2    | 8,5   | 633   | 7,2          | 5,2    | 9,3   |
|              | 2014-2019 | 4927               | 8,9          | 8,1    | 9,6   | 762    | 12,7         | 10,4   | 15,0  | 1055  | 5,9          | 4,6    | 7,4   | 1679   | 11,6         | 10,0   | 13,0  | 1431  | 5,8          | 4,7    | 7,0   |
| <b>40-44</b> | 2002-2007 | 3586               | 11,9         | 10,9   | 13,1  | 460    | 17,0         | 13,7   | 20,7  | 917   | 12,6         | 10,5   | 14,8  | 1258   | 9,4          | 7,9    | 11,0  | 951   | 12,1         | 10,2   | 14,2  |
|              | 2008-2013 | 2769               | 11,0         | 9,8    | 12,1  | 410    | 11,8         | 8,8    | 15,1  | 597   | 12,7         | 10,0   | 15,4  | 1001   | 11,1         | 9,4    | 13,2  | 761   | 9,0          | 7,0    | 11,0  |
|              | 2014-2019 | 4864               | 13,8         | 12,8   | 14,7  | 774    | 13,6         | 11,1   | 15,9  | 960   | 11,7         | 9,6    | 13,8  | 1711   | 14,7         | 13,2   | 16,4  | 1419  | 14,2         | 12,4   | 16,3  |
| <b>45-49</b> | 2002-2007 | 3338               | 15,6         | 14,3   | 16,7  | 443    | 16,3         | 12,9   | 19,9  | 911   | 17,9         | 15,6   | 20,5  | 1122   | 12,7         | 11,0   | 14,7  | 862   | 16,4         | 14,2   | 18,9  |
|              | 2008-2013 | 2950               | 16,2         | 15,0   | 17,6  | 387    | 23,5         | 19,1   | 27,6  | 782   | 18,1         | 15,5   | 20,8  | 1031   | 12,1         | 10,2   | 14,2  | 750   | 16,2         | 13,6   | 18,7  |
|              | 2014-2019 | 5015               | 17,2         | 16,2   | 18,3  | 898    | 18,6         | 16,1   | 21,3  | 964   | 17,2         | 14,7   | 19,5  | 1783   | 16,9         | 15,2   | 18,6  | 1370  | 16,8         | 15,0   | 18,8  |
| <b>50-54</b> | 2002-2007 | 2924               | 20,2         | 18,9   | 21,7  | 389    | 19,1         | 15,2   | 22,9  | 783   | 23,0         | 20,3   | 25,8  | 1044   | 20,2         | 17,9   | 22,8  | 708   | 17,7         | 15,0   | 20,6  |
|              | 2008-2013 | 2864               | 22,2         | 20,5   | 23,7  | 377    | 26,2         | 22,0   | 30,8  | 805   | 24,5         | 21,5   | 27,3  | 926    | 21,6         | 18,8   | 24,3  | 756   | 18,4         | 15,6   | 21,2  |
|              | 2014-2019 | 4204               | 20,8         | 19,6   | 22,0  | 655    | 25,6         | 22,6   | 28,9  | 932   | 23,9         | 21,4   | 26,7  | 1503   | 19,0         | 17,0   | 20,9  | 1114  | 17,7         | 15,4   | 19,7  |
| <b>55-59</b> | 2002-2007 | 2368               | 27,0         | 25,4   | 28,8  | 338    | 24,3         | 19,8   | 29,0  | 614   | 30,6         | 27,0   | 34,5  | 773    | 27,1         | 24,1   | 30,1  | 643   | 24,9         | 21,8   | 28,3  |
|              | 2008-2013 | 2604               | 27,3         | 25,5   | 28,9  | 338    | 27,5         | 22,8   | 32,3  | 748   | 29,0         | 25,8   | 32,4  | 879    | 27,8         | 25,0   | 30,7  | 639   | 24,2         | 21,0   | 27,5  |
|              | 2014-2019 | 3335               | 26,3         | 24,7   | 27,7  | 473    | 26,5         | 22,4   | 30,4  | 885   | 27,7         | 24,6   | 30,4  | 1058   | 27,0         | 24,2   | 29,5  | 919   | 24,0         | 21,2   | 26,8  |
| <b>60-64</b> | 2002-2007 | 2648               | 31,4         | 29,8   | 33,1  | 388    | 24,6         | 20,4   | 28,9  | 729   | 32,5         | 29,2   | 35,7  | 868    | 34,0         | 30,9   | 37,1  | 663   | 30,9         | 27,6   | 34,7  |
|              | 2008-2013 | 2236               | 31,7         | 29,7   | 33,5  | 312    | 24,8         | 19,9   | 30,1  | 613   | 31,2         | 27,4   | 34,9  | 717    | 31,0         | 27,6   | 34,3  | 594   | 36,7         | 33,2   | 40,6  |
|              | 2014-2019 | 2864               | 31,9         | 30,2   | 33,4  | 410    | 32,1         | 27,6   | 36,3  | 826   | 34,1         | 30,8   | 37,3  | 908    | 32,2         | 29,4   | 35,1  | 720   | 28,8         | 25,4   | 31,9  |

| Altersgruppe | Zeitraum  | Deutschland Gesamt |              |        |       | Norden |              |        |       | Osten |              |        |       | Westen |              |        |       | Süden |              |        |       |
|--------------|-----------|--------------------|--------------|--------|-------|--------|--------------|--------|-------|-------|--------------|--------|-------|--------|--------------|--------|-------|-------|--------------|--------|-------|
|              |           | N                  | Prävalenz, % |        |       | N      | Prävalenz, % |        |       | N     | Prävalenz, % |        |       | N      | Prävalenz, % |        |       | N     | Prävalenz, % |        |       |
|              |           |                    | Est.         | low_CI | up_CI |        | Est.         | low_CI | up_CI |       | Est.         | low_CI | up_CI |        | Est.         | low_CI | up_CI |       | Est.         | low_CI | up_CI |
| <b>65-69</b> | 2002-2007 | 2350               | 39,1         | 37,1   | 41,2  | 340    | 35,7         | 30,6   | 40,9  | 708   | 41,2         | 37,6   | 44,9  | 756    | 40,0         | 36,5   | 43,4  | 546   | 37,2         | 32,8   | 41,6  |
|              | 2008-2013 | 2293               | 35,0         | 33,1   | 36,8  | 377    | 29,6         | 24,9   | 34,2  | 639   | 37,7         | 33,8   | 41,2  | 674    | 36,2         | 32,5   | 39,9  | 603   | 34,3         | 30,5   | 37,8  |
|              | 2014-2019 | 2345               | 33,8         | 31,8   | 35,7  | 371    | 28,6         | 24,5   | 33,4  | 630   | 34,2         | 30,6   | 37,8  | 733    | 35,1         | 31,5   | 38,6  | 611   | 34,9         | 31,4   | 38,5  |
| <b>70-74</b> | 2002-2007 | 1542               | 46,7         | 44,2   | 49,2  | 218    | 51,8         | 45,4   | 58,3  | 426   | 48,0         | 43,2   | 52,8  | 524    | 46,6         | 42,2   | 50,8  | 374   | 42,4         | 37,7   | 47,6  |
|              | 2008-2013 | 2143               | 44,0         | 41,9   | 46,1  | 334    | 32,6         | 27,5   | 37,4  | 620   | 48,2         | 44,2   | 51,9  | 664    | 44,4         | 40,8   | 48,5  | 525   | 45,7         | 41,5   | 49,9  |
|              | 2014-2019 | 1980               | 39,2         | 37,3   | 41,4  | 341    | 38,9         | 34,0   | 44,0  | 522   | 38,2         | 34,1   | 42,3  | 573    | 43,8         | 39,8   | 48,0  | 544   | 35,6         | 31,6   | 39,5  |
| <b>75-79</b> | 2002-2007 | 1240               | 55,6         | 52,9   | 58,4  | 189    | 56,6         | 49,7   | 63,5  | 312   | 54,9         | 49,7   | 60,3  | 440    | 52,5         | 47,9   | 57,3  | 299   | 60,1         | 54,8   | 65,6  |
|              | 2008-2013 | 1232               | 51,8         | 49,1   | 54,5  | 195    | 48,0         | 41,0   | 54,4  | 347   | 54,3         | 49,0   | 59,4  | 387    | 52,0         | 46,5   | 56,8  | 303   | 51,1         | 45,5   | 56,4  |
|              | 2014-2019 | 1736               | 48,8         | 46,5   | 51,0  | 233    | 40,4         | 33,9   | 46,4  | 513   | 51,4         | 47,2   | 55,8  | 535    | 52,1         | 47,9   | 56,3  | 455   | 46,2         | 41,5   | 51,0  |

Quelle: SOEP, eigene Berechnungen

Gesundheitsindikator: körperliche Gesundheit

N = Anzahl der Beobachtungen, Est.=Anteil der Personen in schlechter Gesundheit (Prävalenz), low\_CI=untere Grenze des 95 %-Konfidenzintervalls, up\_CI=obere Grenze des 95 %-Konfidenzintervalls

Die Verfahren von Chiang (1984) und Andreev und Shkolnikov (2010) beruhen auf der Annahme, dass die altersspezifischen Sterbefälle oder die Anzahl der Personen mit Gesundheitseinschränkungen statistische Zufallsvariablen sind, die der Binomialverteilung folgen, was die Durchführung von Monte-Carlo-Simulationen ermöglicht (siehe [29] und [30] im Haupttext für eine ausführliche Beschreibung der Methode). Für unsere Analyse haben wir 1000 Simulationen durchgeführt. Für jede simulierte Anzahl an Sterbefällen oder Personen mit Gesundheitseinschränkungen errechnete sich eine andere Sterbetafel mit einem anderen Wert für die (gesunde) Lebenserwartung. Wir erhielten demnach 1000 verschiedene Schätzungen für die (gesunde) Lebenserwartung. Wenn wir diese Schätzungen der Größe nach sortieren (vom höchsten bis zum niedrigsten Wert), entsprechen die 95 %-Konfidenzintervalle den Rängen 25 und 975. Oder anders gesagt: Die 95 %-Konfidenzintervalle ergaben sich aus den 2,5 und 97,5 Perzentilen der Verteilung für die simulierten Werte der (gesunden) Lebenserwartung.

Tab. A2: Partielle Lebenserwartung (in Jahren) nach Geschlecht, Zeitraum, Altersgruppe und Region

| Altersgruppe  | Zeitraum  | Gesamt | Norden | Osten | Süden | Westen | Diff. zwischen Region mit höchster und niedrigster LE (in Jahren) |
|---------------|-----------|--------|--------|-------|-------|--------|-------------------------------------------------------------------|
| <b>Männer</b> |           |        |        |       |       |        |                                                                   |
| <b>20-54</b>  | 2002-2007 | 34,27  | 34,26  | 34,12 | 34,34 | 34,31  | 0,22                                                              |
|               | 2008-2013 | 34,40  | 34,38  | 34,28 | 34,45 | 34,42  | 0,17                                                              |
|               | 2014-2019 | 34,47  | 34,44  | 34,39 | 34,52 | 34,49  | 0,13                                                              |
| <b>55-64</b>  | 2002-2007 | 9,53   | 9,52   | 9,48  | 9,57  | 9,52   | 0,09                                                              |
|               | 2008-2013 | 9,56   | 9,55   | 9,50  | 9,62  | 9,56   | 0,12                                                              |
|               | 2014-2019 | 9,59   | 9,57   | 9,51  | 9,65  | 9,59   | 0,15                                                              |
| <b>65-79</b>  | 2002-2007 | 12,28  | 12,28  | 12,13 | 12,48 | 12,21  | 0,35                                                              |
|               | 2008-2013 | 12,58  | 12,55  | 12,47 | 12,77 | 12,53  | 0,31                                                              |
|               | 2014-2019 | 12,68  | 12,63  | 12,54 | 12,89 | 12,64  | 0,35                                                              |
| <b>20-79</b>  | 2002-2007 | 53,33  | 53,25  | 52,60 | 53,91 | 53,36  | 1,31                                                              |
|               | 2008-2013 | 54,05  | 53,94  | 53,35 | 54,64 | 54,08  | 1,29                                                              |
|               | 2014-2019 | 54,46  | 54,27  | 53,75 | 55,07 | 54,49  | 1,32                                                              |
| <b>Frauen</b> |           |        |        |       |       |        |                                                                   |
| <b>20-54</b>  | 2002-2007 | 34,65  | 34,63  | 34,64 | 34,69 | 34,65  | 0,05                                                              |
|               | 2008-2013 | 34,70  | 34,68  | 34,68 | 34,72 | 34,69  | 0,05                                                              |
|               | 2014-2019 | 34,73  | 34,71  | 34,71 | 34,75 | 34,72  | 0,04                                                              |
| <b>55-64</b>  | 2002-2007 | 9,76   | 9,75   | 9,77  | 9,78  | 9,75   | 0,04                                                              |
|               | 2008-2013 | 9,77   | 9,75   | 9,78  | 9,80  | 9,75   | 0,04                                                              |
|               | 2014-2019 | 9,78   | 9,76   | 9,78  | 9,81  | 9,76   | 0,05                                                              |
| <b>65-79</b>  | 2002-2007 | 13,48  | 13,48  | 13,40 | 13,60 | 13,44  | 0,20                                                              |
|               | 2008-2013 | 13,62  | 13,59  | 13,60 | 13,73 | 13,56  | 0,17                                                              |
|               | 2014-2019 | 13,64  | 13,58  | 13,68 | 13,75 | 13,55  | 0,20                                                              |
| <b>20-79</b>  | 2002-2007 | 56,37  | 56,24  | 56,29 | 56,68 | 56,23  | 0,45                                                              |
|               | 2008-2013 | 56,66  | 56,50  | 56,63 | 56,97 | 56,50  | 0,47                                                              |
|               | 2014-2019 | 56,81  | 56,62  | 56,80 | 57,14 | 56,63  | 0,52                                                              |

Quelle: SOEP, offizielle Daten aus der amtlichen Statistik, eigene Berechnungen

Tab. A3: Partielle Lebenserwartung in Gesundheit (in Jahren) für die Altersgruppen 20-54, 55-64 und 65-79, nach Geschlecht, Zeitraum und Region, für beide Gesundheitsindikatoren

a) Gesundheitsindikator: körperliche Gesundheit (Physical Component Score, PCS)

| Altersgruppe  | Zeitraum  | Gesamt |        |       | Norden |        |       | Osten |        |       | Süden |        |       | Westen |        |       |
|---------------|-----------|--------|--------|-------|--------|--------|-------|-------|--------|-------|-------|--------|-------|--------|--------|-------|
|               |           | HLE    | low_CI | up_CI | HLE    | low_CI | up_CI | HLE   | low_CI | up_CI | HLE   | low_CI | up_CI | HLE    | low_CI | up_CI |
| <b>Männer</b> |           |        |        |       |        |        |       |       |        |       |       |        |       |        |        |       |
| <b>20-54</b>  | 2002-2007 | 31,62  | 31,30  | 31,92 | 31,47  | 30,54  | 32,36 | 31,34 | 30,70  | 31,95 | 31,94 | 31,34  | 32,50 | 31,62  | 31,06  | 32,16 |
|               | 2008-2013 | 31,63  | 31,25  | 31,99 | 31,18  | 30,08  | 32,20 | 31,00 | 30,16  | 31,79 | 32,41 | 31,75  | 32,96 | 31,68  | 31,03  | 32,30 |
|               | 2014-2019 | 31,40  | 31,11  | 31,69 | 31,17  | 30,41  | 31,89 | 30,94 | 30,25  | 31,60 | 32,00 | 31,47  | 32,52 | 31,28  | 30,76  | 31,78 |
| <b>55-64</b>  | 2002-2007 | 6,98   | 6,82   | 7,15  | 7,22   | 6,80   | 7,61  | 6,72  | 6,40   | 7,06  | 7,19  | 6,87   | 7,50  | 6,93   | 6,64   | 7,22  |
|               | 2008-2013 | 6,83   | 6,65   | 7,01  | 6,95   | 6,44   | 7,40  | 6,24  | 5,88   | 6,59  | 7,08  | 6,74   | 7,41  | 7,05   | 6,75   | 7,36  |
|               | 2014-2019 | 7,12   | 6,96   | 7,28  | 6,95   | 6,54   | 7,34  | 6,85  | 6,54   | 7,14  | 7,43  | 7,13   | 7,72  | 7,19   | 6,92   | 7,46  |
| <b>65-79</b>  | 2002-2007 | 7,50   | 7,20   | 7,80  | 8,25   | 7,54   | 8,99  | 6,95  | 6,35   | 7,56  | 7,68  | 7,06   | 8,30  | 7,45   | 6,94   | 7,97  |
|               | 2008-2013 | 7,99   | 7,71   | 8,26  | 8,84   | 8,16   | 9,51  | 7,06  | 6,52   | 7,61  | 8,46  | 7,90   | 9,02  | 8,03   | 7,54   | 8,49  |
|               | 2014-2019 | 8,65   | 8,39   | 8,90  | 9,10   | 8,47   | 9,68  | 8,21  | 7,69   | 8,71  | 9,07  | 8,59   | 9,58  | 8,41   | 7,95   | 8,86  |
| <b>Frauen</b> |           |        |        |       |        |        |       |       |        |       |       |        |       |        |        |       |
| <b>20-54</b>  | 2002-2007 | 31,33  | 30,98  | 31,67 | 30,89  | 29,87  | 31,86 | 31,16 | 30,47  | 31,82 | 31,42 | 30,75  | 32,05 | 31,60  | 31,02  | 32,14 |
|               | 2008-2013 | 31,36  | 30,97  | 31,73 | 30,54  | 29,39  | 31,63 | 30,93 | 30,12  | 31,70 | 31,83 | 31,13  | 32,49 | 31,63  | 30,98  | 32,24 |
|               | 2014-2019 | 30,77  | 30,45  | 31,09 | 30,15  | 29,32  | 30,95 | 30,89 | 30,19  | 31,55 | 31,50 | 30,94  | 32,02 | 30,44  | 29,88  | 31,00 |
| <b>55-64</b>  | 2002-2007 | 6,91   | 6,74   | 7,07  | 7,36   | 6,93   | 7,79  | 6,69  | 6,34   | 7,02  | 7,06  | 6,70   | 7,37  | 6,78   | 6,47   | 7,07  |
|               | 2008-2013 | 6,89   | 6,72   | 7,07  | 7,20   | 6,71   | 7,67  | 6,84  | 6,49   | 7,18  | 6,82  | 6,47   | 7,15  | 6,89   | 6,58   | 7,19  |
|               | 2014-2019 | 6,94   | 6,79   | 7,10  | 6,90   | 6,51   | 7,33  | 6,76  | 6,47   | 7,07  | 7,23  | 6,93   | 7,53  | 6,88   | 6,61   | 7,15  |
| <b>65-79</b>  | 2002-2007 | 7,20   | 6,87   | 7,52  | 7,09   | 6,26   | 7,91  | 7,02  | 6,41   | 7,63  | 7,36  | 6,68   | 8,01  | 7,26   | 6,72   | 7,82  |
|               | 2008-2013 | 7,75   | 7,45   | 8,05  | 8,67   | 7,96   | 9,42  | 7,31  | 6,76   | 7,90  | 7,79  | 7,19   | 8,40  | 7,63   | 7,06   | 8,20  |
|               | 2014-2019 | 8,16   | 7,87   | 8,44  | 8,73   | 8,02   | 9,43  | 8,10  | 7,55   | 8,64  | 8,45  | 7,88   | 9,00  | 7,70   | 7,16   | 8,23  |

Quelle: SOEP, offizielle Daten aus der amtlichen Statistik, eigene Berechnungen

HLE= gesunde Lebenserwartung in Jahren, low\_CI=untere Grenze des 95 %-Konfidenzintervalls, up\_CI=obere Grenze des 95 %-Konfidenzintervalls

b) Alternativer Gesundheitsindikator: Selbsteinschätzung des Gesundheitszustands

| Altersgruppe  | Zeitraum  | Gesamt |        |       | Norden |        |       | Osten |        |       | Süden |        |       | Westen |        |       |
|---------------|-----------|--------|--------|-------|--------|--------|-------|-------|--------|-------|-------|--------|-------|--------|--------|-------|
|               |           | HLE    | low_CI | up_CI | HLE    | low_CI | up_CI | HLE   | low_CI | up_CI | HLE   | low_CI | up_CI | HLE    | low_CI | up_CI |
| <b>Männer</b> |           |        |        |       |        |        |       |       |        |       |       |        |       |        |        |       |
| <b>20-54</b>  | 1996-2001 | 30,79  | 30,49  | 31,07 | 30,65  | 29,80  | 31,46 | 30,55 | 29,97  | 31,09 | 30,73 | 30,14  | 31,30 | 31,05  | 30,56  | 31,53 |
|               | 2002-2007 | 30,45  | 30,17  | 30,72 | 30,63  | 29,86  | 31,37 | 30,13 | 29,55  | 30,68 | 30,70 | 30,16  | 31,22 | 30,43  | 29,95  | 30,90 |
|               | 2008-2013 | 30,67  | 30,40  | 30,93 | 30,44  | 29,71  | 31,13 | 30,34 | 29,78  | 30,88 | 31,07 | 30,58  | 31,54 | 30,69  | 30,23  | 31,14 |
|               | 2014-2019 | 30,52  | 30,28  | 30,77 | 30,45  | 29,82  | 31,06 | 30,15 | 29,59  | 30,69 | 31,10 | 30,64  | 31,53 | 30,30  | 29,89  | 30,72 |
| <b>55-64</b>  | 1996-2001 | 7,04   | 6,91   | 7,17  | 6,96   | 6,58   | 7,34  | 7,16  | 6,92   | 7,39  | 7,07  | 6,81   | 7,32  | 6,94   | 6,70   | 7,19  |
|               | 2002-2007 | 7,12   | 7,01   | 7,24  | 7,37   | 7,10   | 7,66  | 6,86  | 6,63   | 7,10  | 7,21  | 6,98   | 7,43  | 7,14   | 6,94   | 7,33  |
|               | 2008-2013 | 7,11   | 6,99   | 7,23  | 7,38   | 7,09   | 7,68  | 6,89  | 6,64   | 7,11  | 7,17  | 6,94   | 7,40  | 7,12   | 6,91   | 7,31  |
|               | 2014-2019 | 7,28   | 7,18   | 7,38  | 7,19   | 6,90   | 7,46  | 7,12  | 6,92   | 7,31  | 7,58  | 7,37   | 7,78  | 7,23   | 7,05   | 7,41  |
| <b>65-79</b>  | 1996-2001 | 8,44   | 8,18   | 8,70  | 8,96   | 8,28   | 9,61  | 8,22  | 7,69   | 8,73  | 8,58  | 8,09   | 9,07  | 8,22   | 7,77   | 8,66  |
|               | 2002-2007 | 8,57   | 8,37   | 8,77  | 9,09   | 8,62   | 9,55  | 8,13  | 7,73   | 8,51  | 9,13  | 8,73   | 9,52  | 8,28   | 7,93   | 8,62  |
|               | 2008-2013 | 9,06   | 8,87   | 9,23  | 9,60   | 9,15   | 10,02 | 8,36  | 8,02   | 8,72  | 9,51  | 9,16   | 9,85  | 9,06   | 8,74   | 9,37  |
|               | 2014-2019 | 9,80   | 9,64   | 9,96  | 9,81   | 9,40   | 10,20 | 9,45  | 9,14   | 9,77  | 10,11 | 9,79   | 10,42 | 9,80   | 9,50   | 10,11 |
| <b>Frauen</b> |           |        |        |       |        |        |       |       |        |       |       |        |       |        |        |       |
| <b>20-54</b>  | 1996-2001 | 30,36  | 30,04  | 30,67 | 30,32  | 29,41  | 31,18 | 30,28 | 29,69  | 30,88 | 30,31 | 29,71  | 30,94 | 30,49  | 29,94  | 31,03 |
|               | 2002-2007 | 30,19  | 29,90  | 30,48 | 30,03  | 29,22  | 30,81 | 30,09 | 29,52  | 30,66 | 30,38 | 29,85  | 30,90 | 30,21  | 29,72  | 30,71 |
|               | 2008-2013 | 30,12  | 29,85  | 30,37 | 29,91  | 29,20  | 30,58 | 29,69 | 29,14  | 30,23 | 30,61 | 30,13  | 31,09 | 30,09  | 29,61  | 30,55 |
|               | 2014-2019 | 29,74  | 29,48  | 30,00 | 29,24  | 28,60  | 29,88 | 29,74 | 29,14  | 30,30 | 30,55 | 30,09  | 31,01 | 29,34  | 28,88  | 29,78 |
| <b>55-64</b>  | 1996-2001 | 7,10   | 6,97   | 7,23  | 7,26   | 6,88   | 7,63  | 6,97  | 6,72   | 7,21  | 7,10  | 6,81   | 7,38  | 7,14   | 6,90   | 7,38  |
|               | 2002-2007 | 7,34   | 7,23   | 7,46  | 7,82   | 7,55   | 8,10  | 7,21  | 6,97   | 7,45  | 7,24  | 7,00   | 7,46  | 7,31   | 7,11   | 7,51  |
|               | 2008-2013 | 7,23   | 7,12   | 7,35  | 7,53   | 7,23   | 7,81  | 7,38  | 7,16   | 7,59  | 7,01  | 6,78   | 7,24  | 7,17   | 6,96   | 7,37  |
|               | 2014-2019 | 7,29   | 7,18   | 7,39  | 7,24   | 6,96   | 7,51  | 7,09  | 6,90   | 7,30  | 7,54  | 7,36   | 7,75  | 7,25   | 7,06   | 7,42  |
| <b>65-79</b>  | 1996-2001 | 8,33   | 8,07   | 8,58  | 8,22   | 7,52   | 8,90  | 8,62  | 8,16   | 9,09  | 8,18  | 7,61   | 8,71  | 8,21   | 7,77   | 8,66  |
|               | 2002-2007 | 8,50   | 8,27   | 8,71  | 8,40   | 7,84   | 8,94  | 8,47  | 8,06   | 8,87  | 8,78  | 8,32   | 9,22  | 8,40   | 8,03   | 8,76  |
|               | 2008-2013 | 9,20   | 8,99   | 9,39  | 9,70   | 9,24   | 10,17 | 9,07  | 8,68   | 9,46  | 9,40  | 9,00   | 9,79  | 8,90   | 8,53   | 9,25  |
|               | 2014-2019 | 9,49   | 9,30   | 9,68  | 9,78   | 9,32   | 10,24 | 9,53  | 9,17   | 9,89  | 9,72  | 9,36   | 10,09 | 9,14   | 8,79   | 9,49  |

Quelle: SOEP, offizielle Daten aus der amtlichen Statistik, eigene Berechnungen

HLE= gesunde Lebenserwartung in Jahren, low\_CI=untere Grenze des 95 %-Konfidenzintervalls, up\_CI=obere Grenze des 95 %-Konfidenzintervalls

Tab. A4: Anteil der partiellen gesunden Lebenserwartung an der partiellen Lebenserwartung (%) für die Altersgruppen 20-54, 55-64 und 65-79, nach Geschlecht, Zeitraum und Region, für beide Gesundheitsindikatoren

a) Gesundheitsindikator: körperliche Gesundheit (Physical Component Score, PCS)

| Altersgruppe  | Zeitraum  | Gesamt | Norden | Osten | Süden | Westen |
|---------------|-----------|--------|--------|-------|-------|--------|
| <b>Männer</b> |           |        |        |       |       |        |
| <b>20-54</b>  | 2002-2007 | 92,3   | 91,9   | 91,9  | 93,0  | 92,2   |
|               | 2008-2013 | 91,9   | 90,7   | 90,4  | 94,1  | 92,0   |
|               | 2014-2019 | 91,1   | 90,5   | 90,0  | 92,7  | 90,7   |
| <b>55-64</b>  | 2002-2007 | 73,3   | 75,8   | 70,9  | 75,1  | 72,8   |
|               | 2008-2013 | 71,4   | 72,8   | 65,8  | 73,6  | 73,7   |
|               | 2014-2019 | 74,2   | 72,6   | 72,0  | 77,0  | 74,9   |
| <b>65-79</b>  | 2002-2007 | 61,1   | 67,2   | 57,3  | 61,6  | 61,0   |
|               | 2008-2013 | 63,5   | 70,5   | 56,6  | 66,2  | 64,1   |
|               | 2014-2019 | 68,2   | 72,0   | 65,5  | 70,4  | 66,5   |
| <b>Frauen</b> |           |        |        |       |       |        |
| <b>20-54</b>  | 2002-2007 | 90,4   | 89,2   | 90,0  | 90,6  | 91,2   |
|               | 2008-2013 | 90,4   | 88,1   | 89,2  | 91,7  | 91,2   |
|               | 2014-2019 | 88,6   | 86,9   | 89,0  | 90,6  | 87,7   |
| <b>55-64</b>  | 2002-2007 | 70,8   | 75,6   | 68,5  | 72,2  | 69,5   |
|               | 2008-2013 | 70,6   | 73,8   | 69,9  | 69,6  | 70,6   |
|               | 2014-2019 | 71,0   | 70,7   | 69,2  | 73,7  | 70,4   |
| <b>65-79</b>  | 2002-2007 | 53,4   | 52,6   | 52,4  | 54,1  | 54,0   |
|               | 2008-2013 | 56,9   | 63,8   | 53,8  | 56,7  | 56,2   |
|               | 2014-2019 | 59,8   | 64,3   | 59,2  | 61,4  | 56,8   |

Quelle: SOEP, offizielle Daten aus der amtlichen Statistik, eigene Berechnungen



b) Alternativer Gesundheitsindikator: Selbsteinschätzung des Gesundheitszustands

| Altersgruppe  | Zeitraum  | Gesamt | Norden | Osten | Süden | Westen |
|---------------|-----------|--------|--------|-------|-------|--------|
| <b>Männer</b> |           |        |        |       |       |        |
| <b>20-54</b>  | 1996-2001 | 90,3   | 89,9   | 90,1  | 89,9  | 90,8   |
|               | 2002-2007 | 88,9   | 89,4   | 88,3  | 89,4  | 88,7   |
|               | 2008-2013 | 89,2   | 88,5   | 88,5  | 90,2  | 89,1   |
|               | 2014-2019 | 88,5   | 88,4   | 87,7  | 90,1  | 87,9   |
| <b>55-64</b>  | 1996-2001 | 74,4   | 73,5   | 76,1  | 74,4  | 73,3   |
|               | 2002-2007 | 74,7   | 77,5   | 72,4  | 75,3  | 74,9   |
|               | 2008-2013 | 74,4   | 77,3   | 72,5  | 74,6  | 74,5   |
|               | 2014-2019 | 75,9   | 75,1   | 74,9  | 78,5  | 75,4   |
| <b>65-79</b>  | 1996-2001 | 71,4   | 75,5   | 70,8  | 71,4  | 69,9   |
|               | 2002-2007 | 69,8   | 74,0   | 67,1  | 73,1  | 67,8   |
|               | 2008-2013 | 72,0   | 76,5   | 67,0  | 74,4  | 72,3   |
|               | 2014-2019 | 77,3   | 77,7   | 75,4  | 78,4  | 77,6   |
| <b>Frauen</b> |           |        |        |       |       |        |
| <b>20-54</b>  | 1996-2001 | 87,8   | 87,7   | 87,6  | 87,5  | 88,2   |
|               | 2002-2007 | 87,1   | 86,7   | 86,9  | 87,6  | 87,2   |
|               | 2008-2013 | 86,8   | 86,2   | 85,6  | 88,2  | 86,7   |
|               | 2014-2019 | 85,7   | 84,2   | 85,7  | 87,9  | 84,5   |
| <b>55-64</b>  | 1996-2001 | 72,8   | 74,6   | 71,6  | 72,8  | 73,3   |
|               | 2002-2007 | 75,2   | 80,2   | 73,8  | 74,0  | 75,0   |
|               | 2008-2013 | 74,0   | 77,2   | 75,5  | 71,6  | 73,5   |
|               | 2014-2019 | 74,5   | 74,2   | 72,5  | 76,9  | 74,2   |
| <b>65-79</b>  | 1996-2001 | 63,1   | 62,1   | 66,1  | 61,3  | 62,2   |
|               | 2002-2007 | 63,1   | 62,3   | 63,2  | 64,5  | 62,4   |
|               | 2008-2013 | 67,5   | 71,4   | 66,6  | 68,4  | 65,7   |
|               | 2014-2019 | 69,6   | 72,1   | 69,7  | 70,7  | 67,5   |

Quelle: SOEP, offizielle Daten aus der amtlichen Statistik, eigene Berechnungen

Abbildung A1: Partielle Lebenserwartung in Gesundheit für die Altersgruppen 20-54, 55-64 und 65-79, nach Geschlecht, Zeitraum und Region (in Jahren) (Gesundheitsindikator: Selbsteinschätzung des Gesundheitszustands)

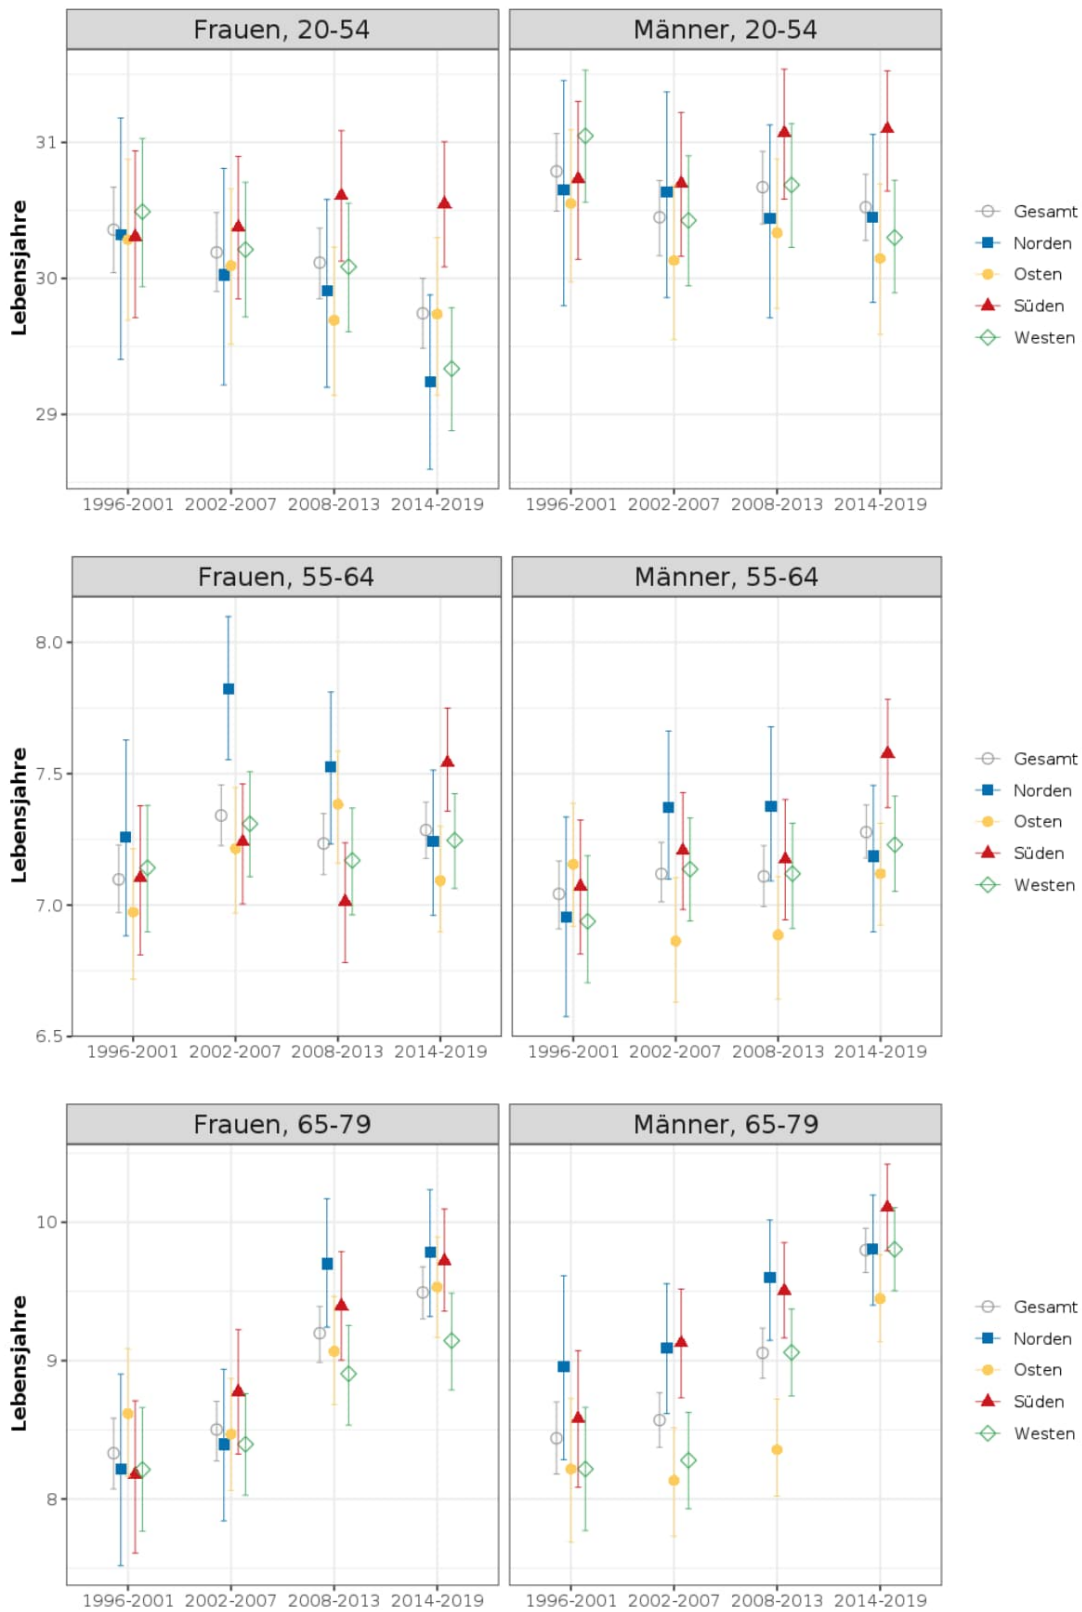

Quelle: Eigene Berechnungen und Abbildung

Abbildung A2: Anteil der partiellen gesunden Lebenserwartung (in Prozent) an der partiellen Lebenserwartung für die Altersgruppe 65-79, nach Geschlecht und Region für die Zeiträume 2002-2007 und 2014-2019 (Gesundheitsindikator: Selbsteinschätzung des Gesundheitszustands)

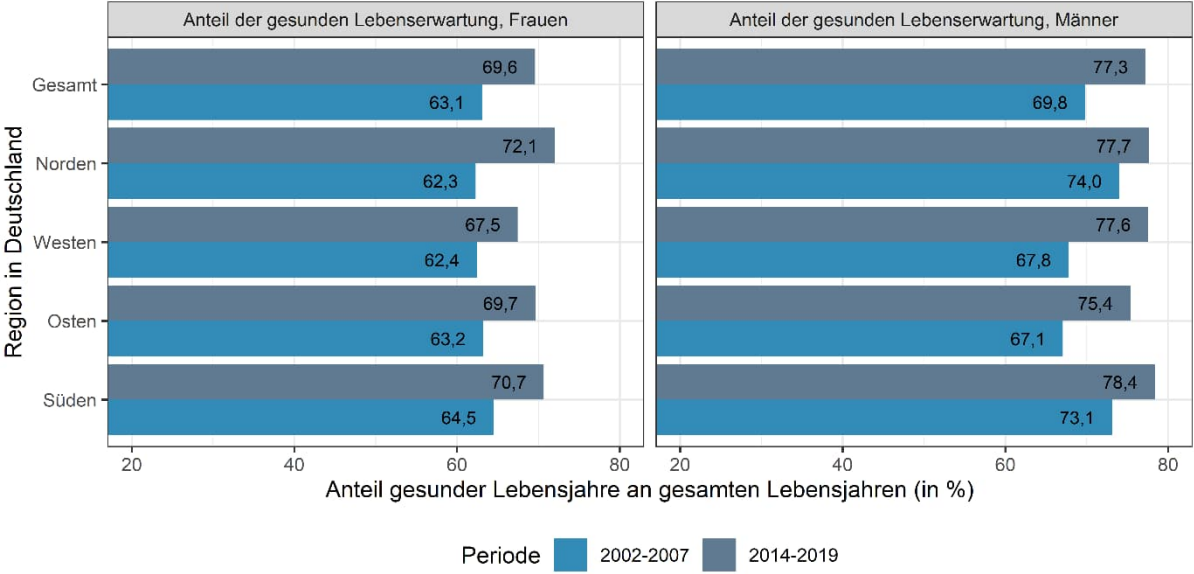

Quelle: Eigene Berechnungen und Abbildung
